# Supplementary material for: Characterisation of Single-step Charcoal-purified Cosmetic-grade C- Phycocyanin Produced from Native Spirulina platensis in Bangladesh
Source: Research Square preprint supplement (doi:10.21203/rs.3.rs-8820282/v1), 2026-02-18
Supplement: Supplementary file 1 [file e543c1f0cb245606e262c84e.docx]

Characterisation of Single-step Charcoal-purified Cosmetic-grade C-Phycocyanin Produced from Native *Spirulina platensis* in Bangladesh

# Supplementary Information

## Supplementary Tables

**Table S1a** Composition of Bd1 medium (pH 8.6) for *Spirulina* cultivation

| **Components** | **Quantity (g L-1)** |
| --- | --- |
| NaHCO3 | 3.2 |
| NaNO3 | 0.5 |
| KCl | 0.2 |
| MgSO4.2H2O | 0.1 |
| FeSO4.7H2O | 0.002 |
| CaCl2 | 0.008 |
| EDTA | 0.008 |
| H2SO4 (96%) | 0.1 (mL) |
| H3PO4 (85%) | 0.4 (mL) |
| A8 trace element solution | 1.0 (mL) |
| B3 trace element solution | 1.0 (mL) |

**Table S1b** Composition of A8 trace element solution for Bd1 medium

| **Components** | **Quantity (g L-1)** |
| --- | --- |
| MnCl2.4H2O | 1.63 |
| ZnSO4.7H2O | 2.32 |
| CuSO4.5H2O | 0.32 |
| NiSO4.7H2O | 0.35 |
| Co(NO3)2.6H2O | 0.37 |
| H3BO3 | 2.98 |
| H2SO4 (96%) | 2.75 (mL) |

**Table S1c** Composition of B3 trace element solution for Bd1 medium

| **Components** | **Quantity (g L-1)** |
| --- | --- |
| NaOH | 4.12 |
| MoO3 | 0.5 |
| NH4VO3 | 0.35 |
| Na2WO4 | 0.14 |

**Table S2** Toxic heavy metal content in harvested *Spirulina* paste

| **Heavy metals** | **Content (µg g-1 FW) in *Spirulina* paste** | ***Permissible content (µg g-1)** |
| --- | --- | --- |
| 59Co | 0.47 ± 0.01 |  |
| 52Cr | 0.93 ± 0.00 |  |
| 111Cd | 0.07 ± 0.01 | 0.5 |
| 75As | 0.12 ± 0.00 | 0.1 |
| 208Pb | 1.46 ± 0.00 | 0.1 |
| 202Hg | 0.00 ± 0.00 | 0.1 |
| **According to the General Standards for Contaminants and Toxins in Food and Feed, FAO, 1995* *(Codex Alimentarius Commission, 1995)* | | |

**Table S3** C-PC, APC, and Chl concentrations in crude extracts of FD and AD powders obtained by employed extraction techniques, S/L ratio, and extraction durations

| **Dry preparation** | **Extraction technique** | **S/L ratio (g DW mL-1)** | **Duration (h)** | **C-PC conc. (mg mL-1)** | **APC conc. (mg mL-1)** | **Chl conc. (mg mL-1)** |
| --- | --- | --- | --- | --- | --- | --- |
| FD | DAE | 1:20 | 8 | 4.96 ± 0.07b | 0.86 ± 0.02c | 0.31 ± 0.01c |
| SAE | 6.09 ± 0.13a | 1.05 ± 0.03a | 0.37 ± 0.01a |
| UAE | 5.14 ± 0.04b | 0.40 ± 0.01f | 0.29 ± 0.01d |
| AD | DAE | 4.98 ± 0.09b | 0.75 ± 0.02d | 0.29 ± 0.01d |
| SAE | 5.88 ± 0.02a | 0.99 ± 0.01b | 0.35 ± 0.00b |
| UAE | 4.48 ± 0.08c | 0.48 ± 0.01e | 0.29 ± 0.01d |
| FD | SAE | 1:10 | 8 | 10.25 ± 0.53a | 2.18 ± 0.15a | 0.65 ± 0.04a |
| 1:20 | 6.09 ± 0.13b | 1.05 ± 0.03b | 0.37 ± 0.01c |
| 1:30 | 4.49 ± 0.07c | 0.85 ± 0.02cd | 0.27 ± 0.01d |
| 1:40 | 2.81 ± 0.03d | 0.50 ± 0.01e | 0.17 ± 0.00e |
| 1:50 | 1.87 ± 0.02e | 0.34 ± 0.01f | 0.11 ± 0.00f |
| AD | 1:10 | 10.07 ± 0.11a | 2.04 ± 0.04a | 0.61 ± 0.01b |
| 1:20 | 5.88 ± 0.02b | 0.99 ± 0.01bc | 0.35 ± 0.00c |
| 1:30 | 4.24 ± 0.06c | 0.72 ± 0.03d | 0.24 ± 0.01d |
| 1:40 | 2.77 ± 0.02d | 0.46 ± 0.01ef | 0.16 ± 0.00e |
| 1:50 | 1.83 ± 0.01e | 0.32 ± 0.01f | 0.11 ± 0.00f |
| FD | SAE | 1:30 | 8 | 4.49 ± 0.07b | 0.85 ± 0.02c | 0.27 ± 0.01b |
| 16 | 4.88 ± 0.06a | 0.77 ± 0.00d | 0.28 ± 0.00ab |
| 24 | 4.23 ± 0.03c | 0.85 ± 0.01c | 0.26 ± 0.00c |
| AD | 8 | 4.24 ± 0.06c | 0.72 ± 0.03d | 0.24 ± 0.01d |
| 16 | 4.62 ± 0.06b | 0.92 ± 0.01b | 0.29 ± 0.00a |
| 24 | 4.10 ± 0.09c | 1.10 ± 0.01a | 0.28 ± 0.00b |
| *Different superscripts in the same column differ significantly (p<0.05) by the Tukey’s pairwise comparison test* | | | | | | |

**Table S4** C-PC, APC, and Chl concentrations in ACA purified extracts after CA treatment at varied charcoal quantity for varied adsorption period

| **Crude extract** | **CA conc. (g L-1)** | **Period (h)** | **C-PC conc. (mg mL-1)** | **APC conc. (mg mL-1)** | **Chl conc. (mg mL-1)** |
| --- | --- | --- | --- | --- | --- |
| C-FD | 10 | 8 | 4.31 ± 0.14a | 0.99 ± 0.04a | 0.27 ± 0.01a |
| 30 | 4.11 ± 0.03ab | 0.79 ± 0.04b | 0.24 ± 0.01b |
| 60 | 3.71 ± 0.07cd | 0.61 ± 0.05c | 0.21 ± 0.01c |
| 90 | 2.79 ± 0.08e | 0.23 ± 0.02e | 0.13 ± 0.01e |
| C-AD | 10 | 4.08 ± 0.03ab | 1.02 ± 0.01a | 0.27 ± 0.00 a |
| 30 | 3.91 ± 0.07bc | 0.68 ± 0.02bc | 0.22 ± 0.01bc |
| 60 | 3.47 ± 0.24d | 0.47 ± 0.06d | 0.18 ± 0.02d |
| 90 | 3.03 ± 0.12e | 0.23 ± 0.04e | 0.14 ± 0.01e |
| C-FD | 60 | 8 | 3.71 ± 0.07a | 0.61 ± 0.05a | 0.21 ± 0.01a |
| 16 | 3.46 ± 0.00ab | 0.72 ± 0.00a | 0.21 ± 0.00ab |
| 24 | 3.30 ± 0.04b | 0.34 ± 0.02c | 0.16 ± 0.00c |
| C-AD | 8 | 3.47 ± 0.24ab | 0.47 ± 0.06b | 0.18 ± 0.02bc |
| 16 | 3.37 ± 0.20ab | 0.71 ± 0.04a | 0.20 ± 0.01ab |
| 24 | 3.30 ± 0.07b | 0.33 ± 0.04c | 0.16 ± 0.01c |
| *Different superscripts in the same column differ significantly (p<0.05) by the Tukey’s pairwise comparison test* | | | | | |

**Table S5a** Protein-specific peaks in infrared spectra of C-PC powders compared to the reference standard

| **C-PC powders** | **Characteristic vibration peaks (cm-1)** | | | | | | | |
| --- | --- | --- | --- | --- | --- | --- | --- | --- |
| **O-H/**  **N-H** | **-CH2/=C-H** | | **Amide I**  **(C=O)** | **Amide II**  **(N-H)** | **Amide III**  **(N-H/C-N)** | **C=C**  **(pyrrole)** | **O-H**  **(acid)** |
| Ref. std. | 3272 | 2927 | 2876 | 1651 | 1542 | 1452 | 1402 | 1267 |
| C-FD | 3272 | 2928 | 2875 | 1651 | 1544 | 1451 | 1402 | 1257 |
| C-AD | 3272 | 2930 | 2874 | 1651 | 1546 | 1451 | 1402 | 1246 |
| P-FD | 3272 | 2928 | 2875 | 1651 | 1544 | 1451 | 1402 | 1258 |
| P-AD | 3271 | 2930 | 2875 | 1651 | 1545 | 1450 | 1402 | 1246 |

**Table S5b** Peaks at fingerprint region in the infrared spectra of C-PC powders compared to the reference standard

| **C-PC powders** | **Characteristic vibration peaks (cm-1)** | | | | | |
| --- | --- | --- | --- | --- | --- | --- |
| **Fingerprint Region** | | | | | |
| Ref. std. | 1045 | 987 | 923 | 833 | - | 531 |
| C-FD | 1049 | 989 | 926 | 854 | 668 | 527 |
| C-AD | 1052 | 992 | 944 | 855 | 668 | 527 |
| P-FD | 1048 | 989 | 925 | 854 | 668 | 526 |
| P-AD | 1052 | 992 | 944 | 855 | 668 | 526 |

**Table S6** DPPH radical scavenging activity and ascorbic acid equivalent antioxidant capacity (AAEAC) of C-PC powders

| **Test samples** | **Regression line** | **R2** | **IC50 (µg mL-1)** | **AAEAC (µg mg -1 C-PC)** |
| --- | --- | --- | --- | --- |
| AA | y = 10.150x - 3.226 | 0.995 | 5.24 ± 0.17 | - |
| C-FD | y = 0.051x + 13.249 | 0.989 | 720.61 ± 13.82 | 7.28 ± 0.29 |
| C-AD | y = 0.050x + 11.206 | 0.988 | 775.88 ± 9.90 | 6.76 ± 0.17 |
| P-FD | y = 0.054x + 18.981 | 0.952 | 574.43 ± 17.58 | 9.13 ± 0.42 |
| P-AD | y = 0.053x + 17.136 | 0.974 | 620.08 ± 17.92 | 8.46 ± 0.43 |

**Table S7** Cytotoxicityof C-PC powders and VCS on *A. salina* nauplii

| **Test samples** | **Regression line** | **R2** | **LC50 (µg mL-1)** |
| --- | --- | --- | --- |
| VCS | y = 30.800x + 60.645 | 0.973 | 0.45 ± 0.03 |
| C-FD | y = 25.368x - 5.644 | 0.955 | 156.13 ± 14.07 |
| C-AD | y = 24.764x - 5.891 | 0.945 | 180.70 ± 19.22 |
| P-FD | y = 27.783x - 2.658 | 0.968 | 78.58 ± 11.53 |
| P-AD | y = 26.173x - 4.649 | 0.955 | 122.46 ± 12.48 |

## Supplementary Figures


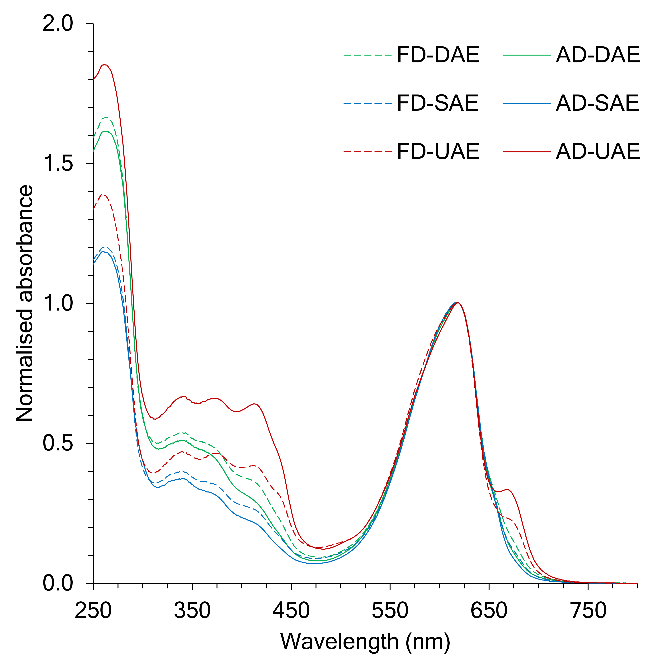

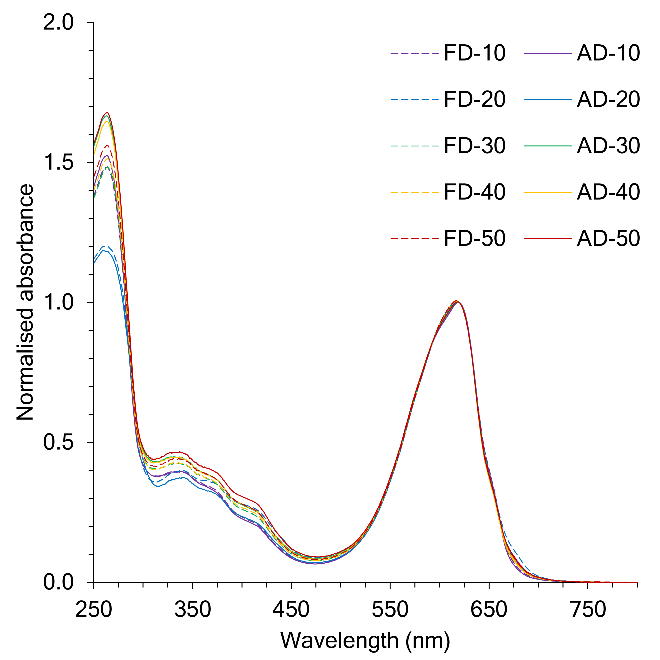

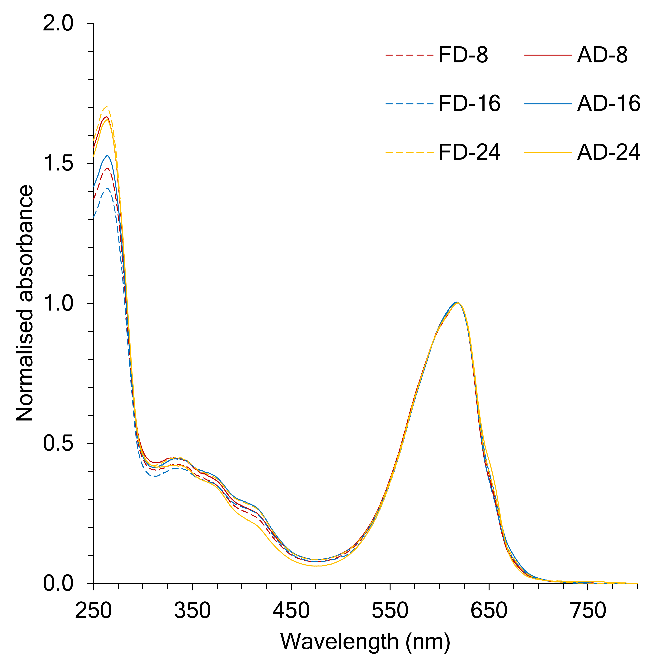


**a**

**b**

**c**

**Figure S1** Normalised UV-Vis spectra of crude C-PC extracts of FD and AD powders, obtained from **a.** DAE, SAE, and UAE techniques; **b.** 1:10-1:50 (w/v) S/L ratio using SAE; and **c.** 8, 16, and 24 h of extraction durations using SAE at 1:30 S/L ratio.


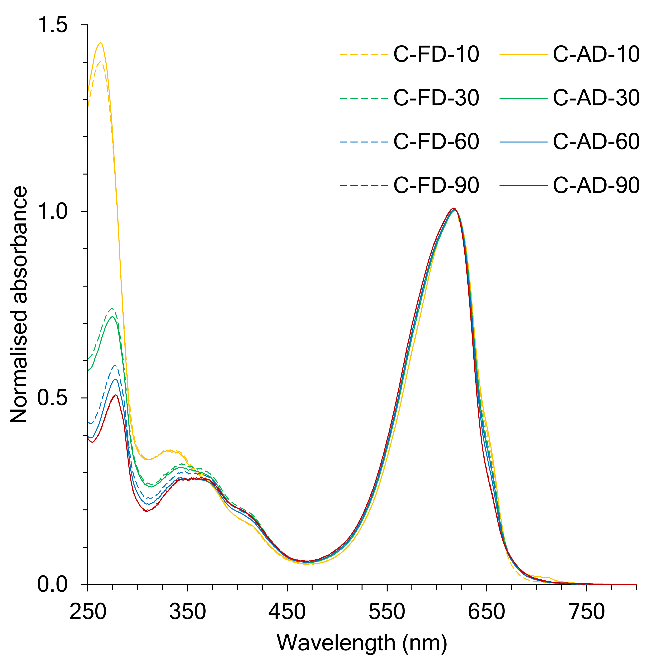

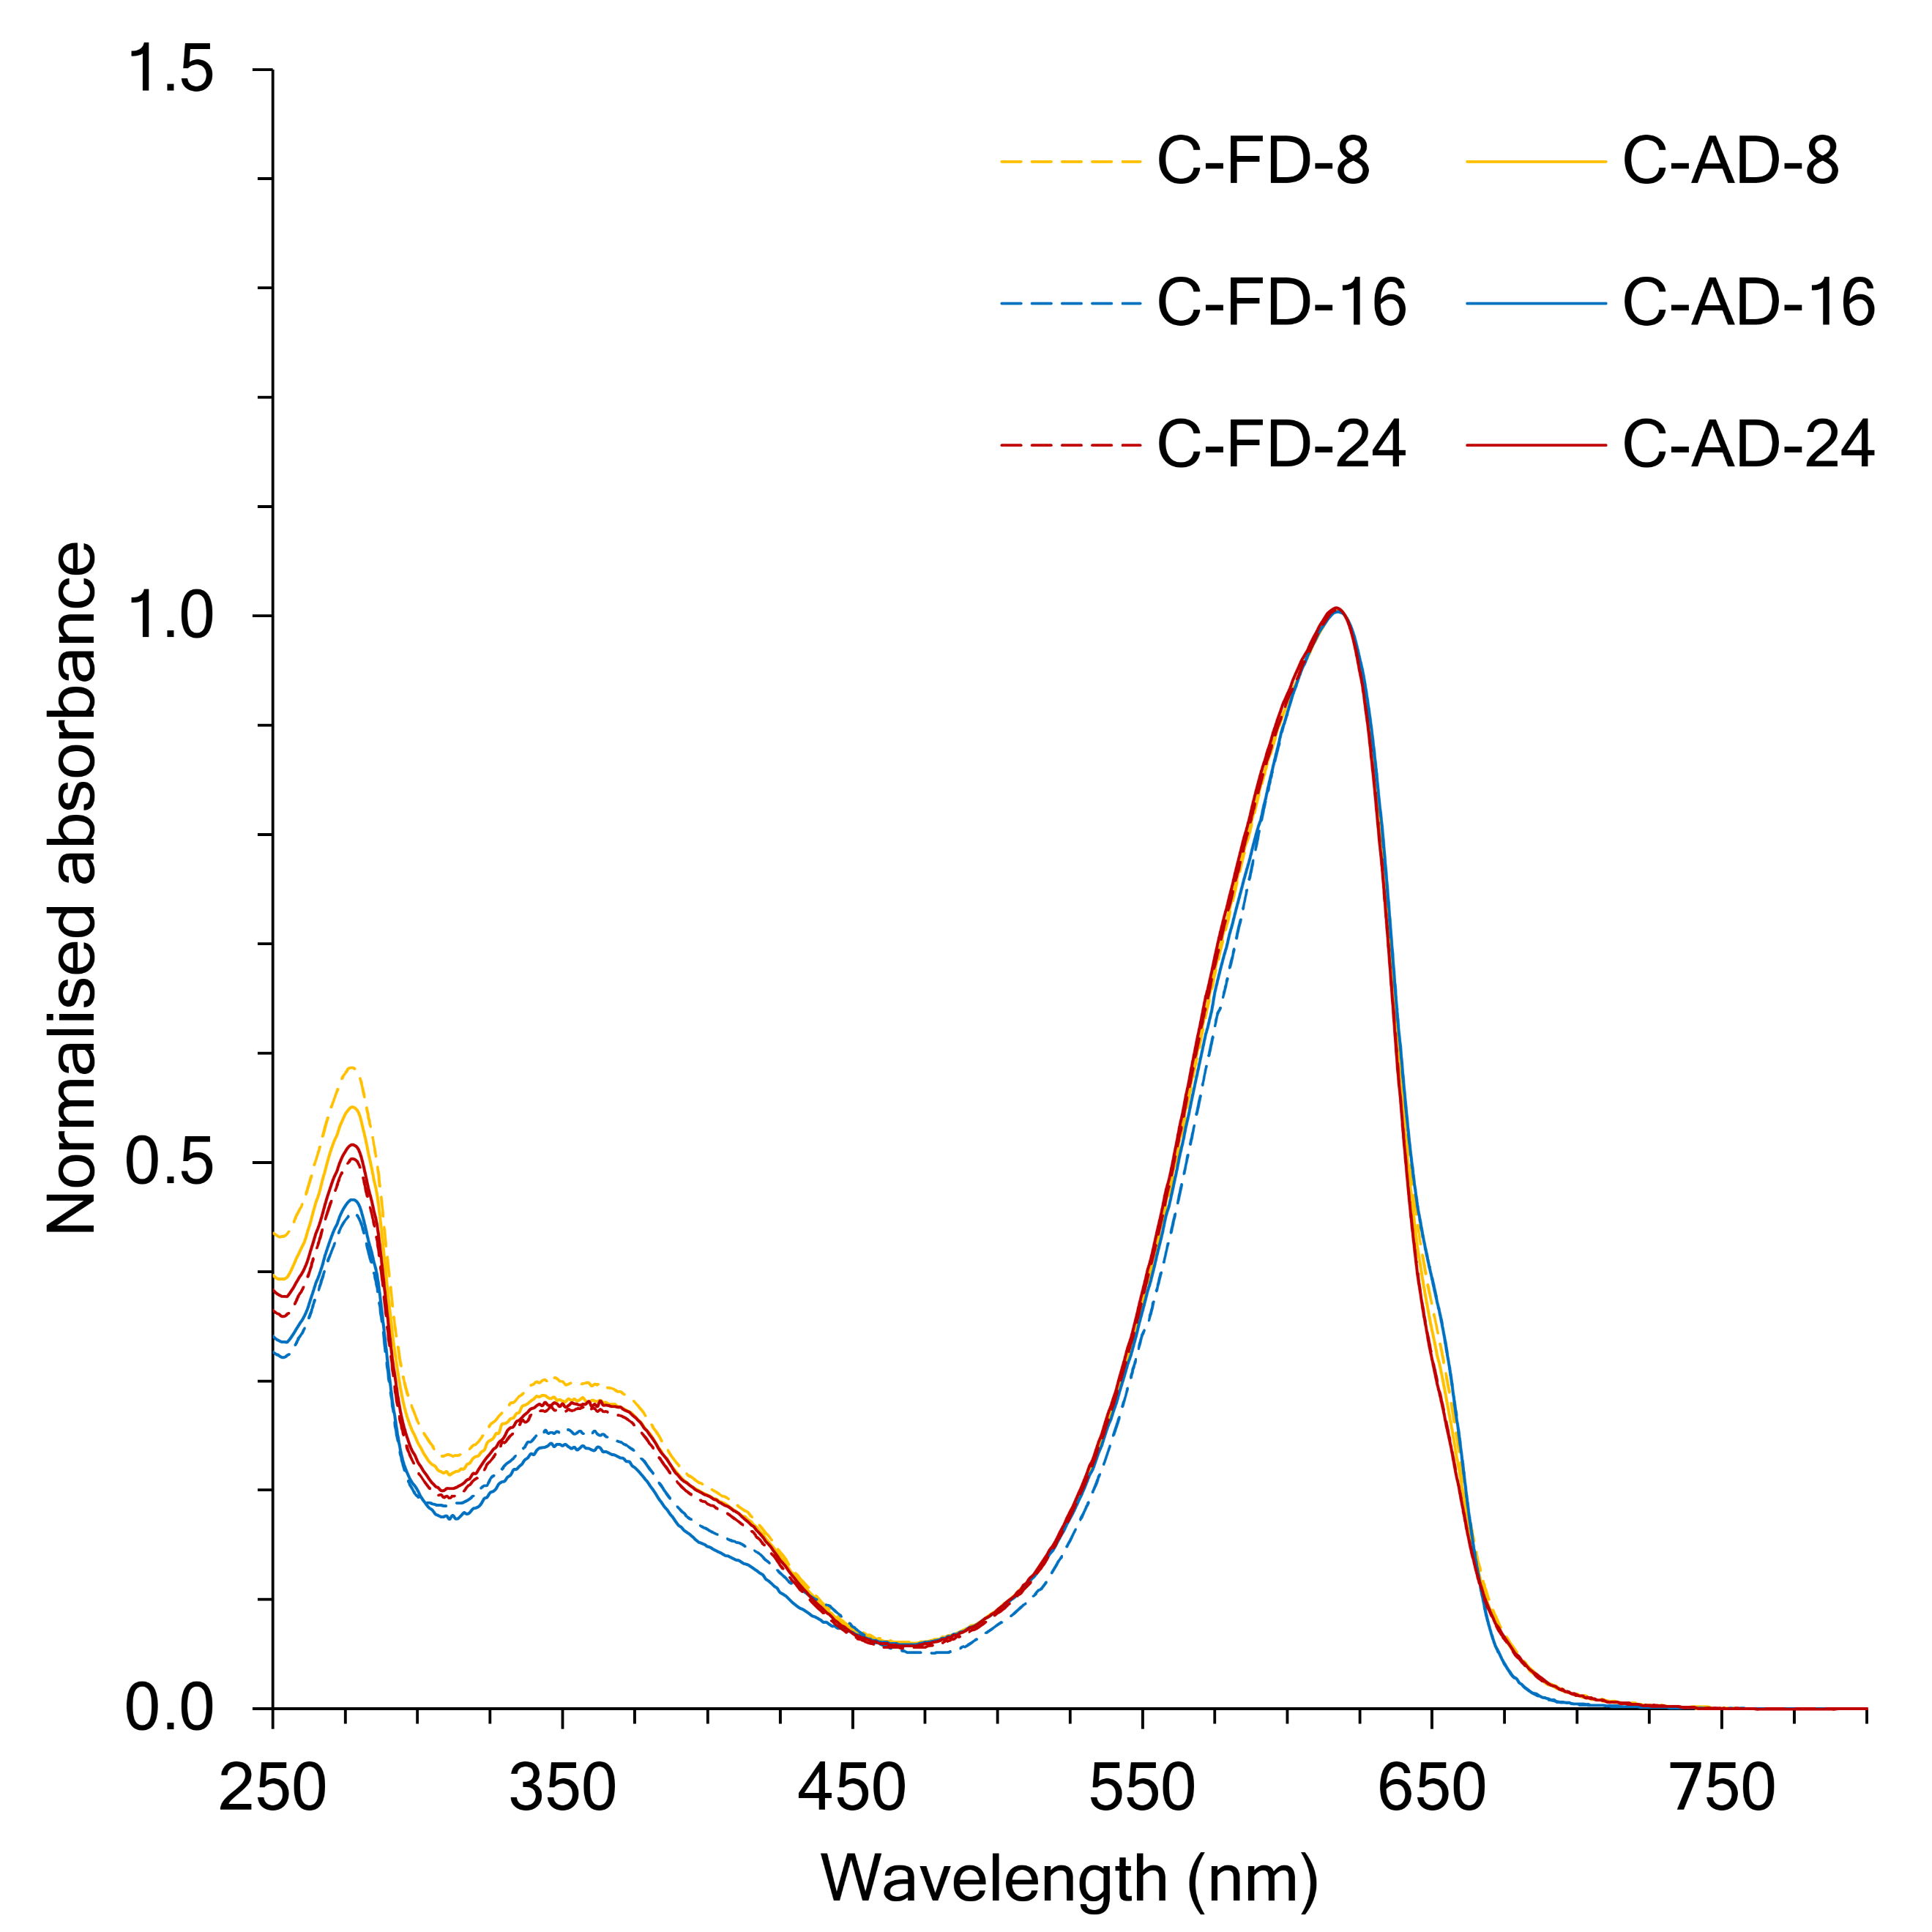


**a**

**b**

**Figure S2** Normalised UV-Vis spectra of ACA purified C-PC extracts using **a.** charcoal concentrations of 10, 30, 60, and 90 g L-1 and **b.** 8, 16, and 24 h of purification period at 60 g L-1 charcoal concentration


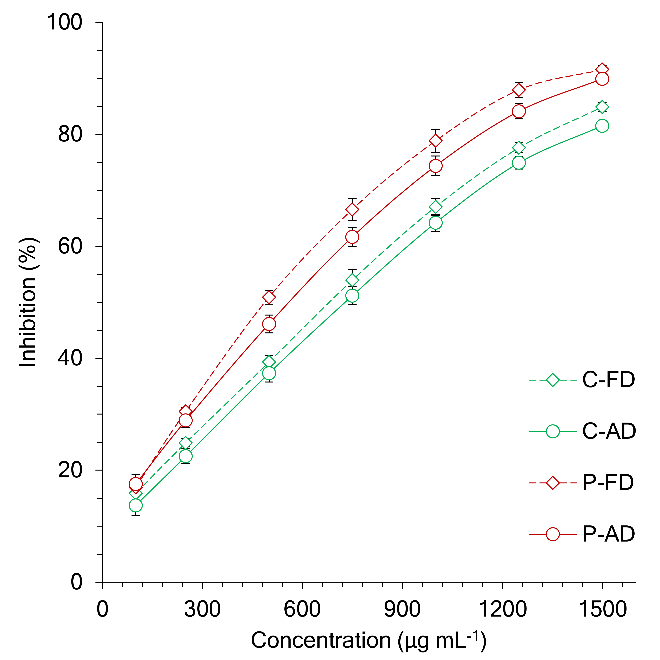

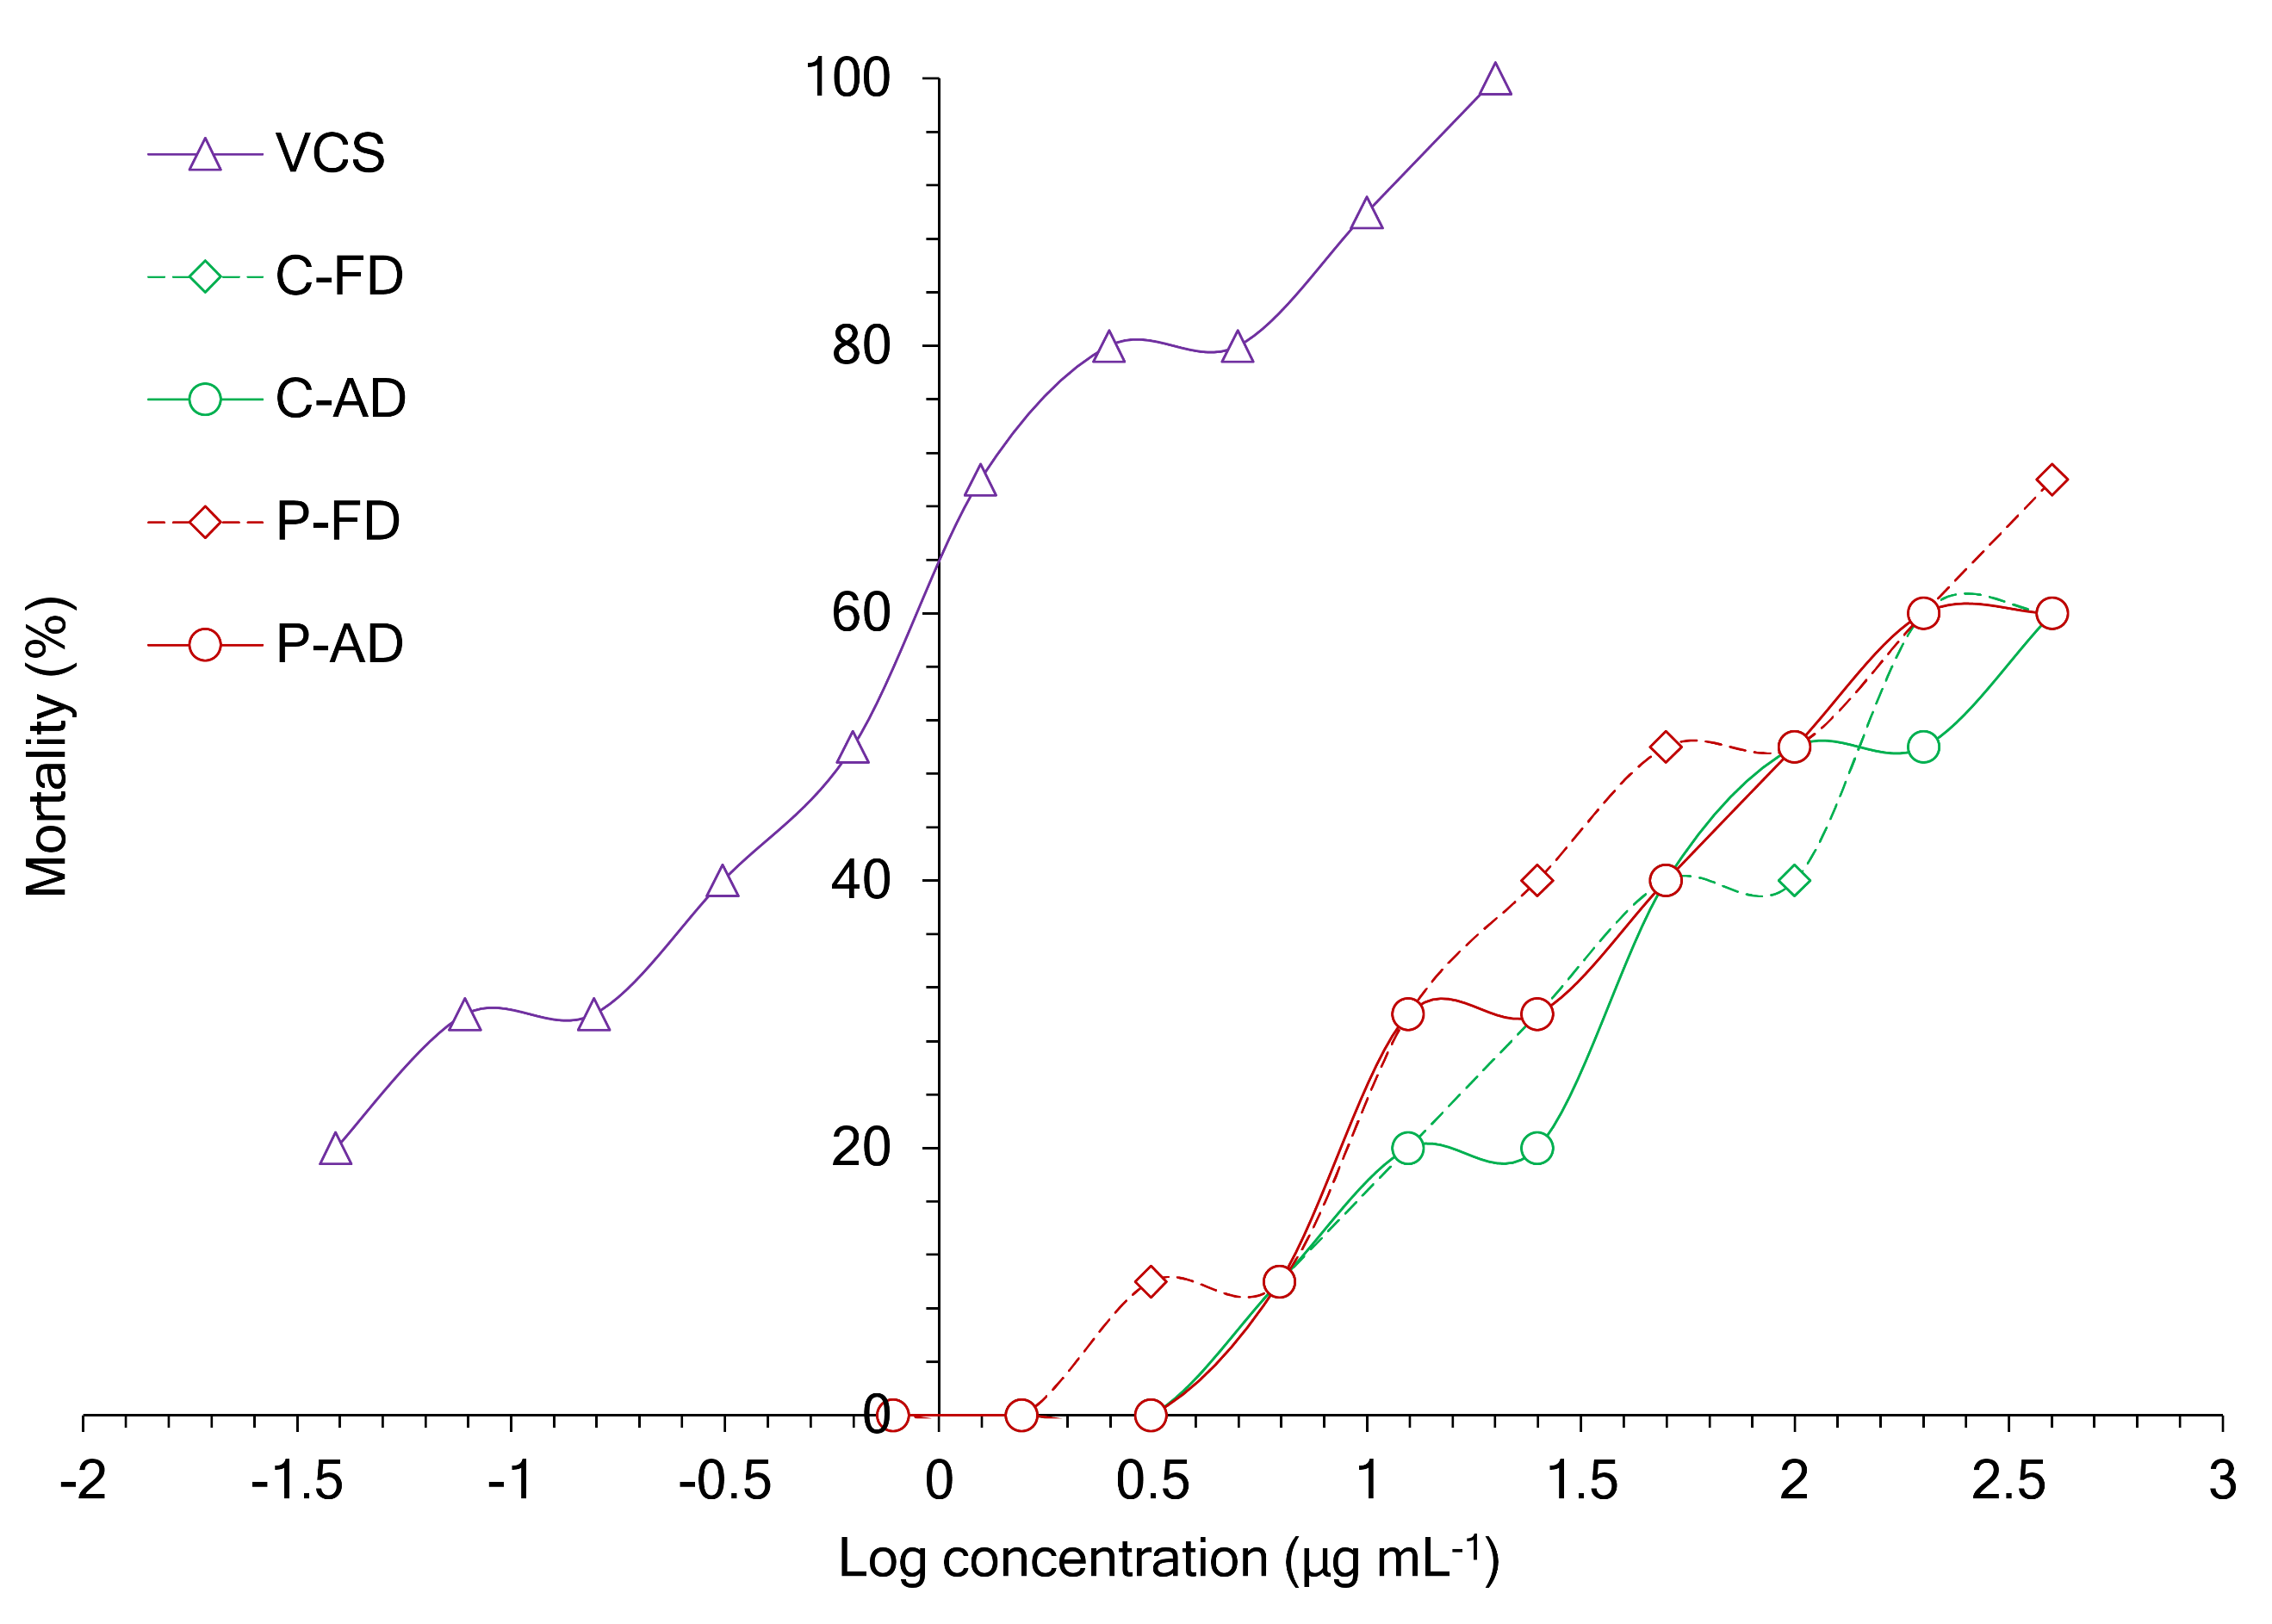


**a**

**b**

**Figure S3** Linear regressions of **a.** C-PC concentration vs. DPPH scavenging percentage; and **b.** C-PC and VCS concentration vs. percentage mortality of *A. salina*
